## **Glycomic analysis of host-response reveals high mannose as a key mediator of influenza severity**

Daniel W. Heindel<sup>1\*</sup>, Sujeethraj Koppolu<sup>1\*</sup>, Yue Zhang<sup>1\*</sup>, Brian Kasper<sup>1</sup>, Lawrence Meche<sup>1</sup>, Christopher Vaiana<sup>1</sup>, Stephanie J. Bissel<sup>2</sup>, Chalise E. Carter<sup>3</sup>, Alyson A. Kelvin<sup>4</sup>, Bin Zhang<sup>5</sup>, Bin Zhou<sup>6</sup>, Tsui-Wen Chou<sup>6</sup>, Lauren Lashua<sup>6</sup>, Ted M. Ross<sup>3</sup>, Elodie Ghedin<sup>6,7</sup> and Lara K. Mahal<sup>1,8‡</sup>

<sup>1</sup>Biomedical Research Institute, Department of Chemistry, New York University, NY;

<sup>2</sup>Department of Pathology, University of Pittsburgh School of Medicine, Pittsburgh, PA;

<sup>3</sup>Center for Vaccines and Immunology, University of Georgia, GA;

<sup>4</sup>Department of Pediatrics, Dalhousie University, Halifax, NS, Canada;

<sup>5</sup>Department of Genetics and Genomic Sciences, Mount Sinai Center for Transformative Disease Modeling, Icahn Institute of Genomics and Multiscale Biology, Icahn School of Medicine at Mount Sinai, NY;

<sup>6</sup>Center for Genomics & Systems Biology, Department of Biology, New York University, NY;

<sup>7</sup>Department of Epidemiology, School of Global Public Health, New York University, NY;

<sup>8</sup>Current Address: Department of Chemistry, University of Alberta, Edmonton, AB, CANADA.

\*Authors Contributed Equally

‡Corresponding author: [lkmahal@ualberta.ca](mailto:lkmahal@ualberta.ca)

1 **ABSTRACT**

2 Influenza virus infections cause a wide variety of outcomes, from mild disease  
3 to 3-5 million cases of severe illness and ~290,000-645,000 deaths annually  
4 worldwide. The molecular mechanisms underlying these disparate outcomes are  
5 currently unknown. Glycosylation within the human host plays a critical role in  
6 influenza virus biology. However, the impact these modifications have on the severity  
7 of influenza disease has not been examined. Herein, we profile the glycomic host  
8 responses to influenza virus infection as a function of disease severity using a ferret  
9 model and our lectin microarray technology. We identify the glycan epitope high  
10 mannose as a marker of influenza virus-induced pathogenesis and severity of  
11 disease outcome. Induction of high mannose is dependent upon the unfolded protein  
12 response (UPR) pathway, a pathway previously shown to associate with lung  
13 damage and severity of influenza virus infection. Also, the mannan-binding lectin  
14 (MBL2), an innate immune lectin that negatively impacts influenza outcomes,  
15 recognizes influenza virus-infected cells in a high mannose dependent manner.  
16 Together, our data argue that the high mannose motif is an infection-associated  
17 molecular pattern on host cells that may guide immune responses leading to the  
18 concomitant damage associated with severity.

19

20 **SIGNIFICANCE**

21 Influenza virus infection causes a range of outcomes from mild illness to  
22 death. The molecular mechanisms leading to these differential host responses are  
23 currently unknown. Herein, we identify the induction of high mannose, a glycan  
24 epitope, as a key mediator of severe disease outcome. We propose a mechanism in  
25 which activation of the unfolded protein response (UPR) upon influenza virus  
26 infection turns on expression of high mannose, which is then recognized by the  
27 innate immune lectin MBL2, activating the complement cascade and leading to  
28 subsequent inflammation. This work is the first to systematically study host glycomic  
29 changes in response to influenza virus infection, identifying high mannose as a key  
30 feature of differential host response.

31

## 32 INTRODUCTION

33 Influenza virus infections cause ~290,000-645,000 deaths (1) and 3-5 million  
34 cases of severe illness annually worldwide (2). Viral infection begins in the upper  
35 respiratory tract. It can lead to airway inflammation in the lungs and, in severe cases,  
36 pneumonia. The molecular mechanisms that underlie disparate outcomes of mild,  
37 moderate, and severe illness are currently unknown.

38 Glycosylation within the human host plays a critical role in influenza biology  
39 (3). Influenza virus infection is initiated by adhesion of viral hemagglutinin (HA) to  
40 glycans containing  $\alpha$ -2,6-linked sialic acids on the human host epithelial cells. Viral  
41 propagation requires cleavage of these sialic acid residues by the influenza virus  
42 enzyme neuraminidase (NA), the current target of some anti-viral therapies (4). Due  
43 to their role in influenza biology, glycans have been studied in influenza almost  
44 exclusively in the context of binding to sialic acids. However, whether sialic acid plays  
45 a role in the severity of the host response to influenza virus infection is unknown. In  
46 addition, there are currently no systematic studies on the response of the host  
47 glycome to influenza virus infection. Whether host glycosylation (e.g. sialylation and  
48 other motifs) is modulated upon infection, and what impact these modifications could  
49 have on the severity of influenza virus induced disease have not been examined.

50 Studies of influenza in model organisms, such as mice, commonly use strains  
51 of the virus adapted to the sialic acid receptors prevalent in the upper respiratory  
52 tract of these hosts (i.e.  $\alpha$ -2,3-linked sialosides), which differ from  $\alpha$ -2,6-sialosides  
53 found in the human respiratory tract. Ferrets, however, have a similar glycan  
54 distribution in their respiratory system to humans, i.e.  $\alpha$ -2,6-linked sialic acids and  
55 low levels of N-glycolyl sialosides in the upper respiratory tract. This makes them a  
56 more representative model for human biology, enabling the use of un-adapted  
57 human strains of influenza (5).

58 Here, we ask whether glycosylation might play a role in the outcome of  
59 influenza virus infection. We analyzed ferret host response in the lung to the 2009  
60 pandemic H1N1 (H1N1pdm09) influenza virus using our lectin microarray  
61 technology (6-8). This H1N1 strain caused an estimated 150,000-580,000 deaths  
62 worldwide in the first 12 months of circulation, with wide variation in outcomes among

63 infected individuals (9). Our lectin microarray technology is a well-established  
64 method that provides a systems-level perspective on glycosylation (6, 8, 10, 11).  
65 Although we observed changes in sialic acid in response to H1N1pdm09 influenza  
66 virus infection, they did not correlate with severity. Instead, we identified high  
67 mannose, an epitope rarely observed at the cell surface (12), as a marker of severity  
68 and damage in the ferret lung. Induction of high mannose was shown to depend  
69 upon the unfolded protein response (UPR) pathway, which is associated with  
70 influenza disease severity in mouse models (13). We also observed that mannan-  
71 binding lectin (MBL2), an innate immune lectin that binds several different glycans  
72 (e.g. Lewis structures (14, 15), high mannose (16), yeast mannans (17), fucose (15)),  
73 recognizes influenza virus infected cells in a high mannose dependent manner.  
74 MBL2 is also associated with the severity of influenza in mouse models (18) and  
75 more recently in clinical analysis (19). Together, our data argue that the high  
76 mannose motif is an influenza infection-associated molecular pattern on host cells  
77 that guides immune responses leading to the concomitant damage associated with  
78 influenza disease severity.

79

## 80 **RESULTS**

### 81 **Lectin Microarray Analysis of Ferret Lungs After Influenza Infection**

82 To study the impact of influenza virus infection on host glycosylation, we  
83 infected ferrets with the 2009 pandemic H1N1 strain, A/California/07/2009 (H1N1).  
84 This strain causes a wide variation in outcomes among infected ferrets, mimicking  
85 the human host response (20). Infected adult ferrets (n=19) were weighed daily  
86 during the experiment and sacrificed at day 8 post-infection. By day 8, ferrets are at  
87 the start of the recovery period from infection, as observed from weight loss and  
88 pathology data (20). The severity of the infection was determined based on weight  
89 loss. The weight loss nadir was used with the lowest quartile defined as mild (weight  
90 loss less than 10.5%, n=5 ferrets), the middle quartile as moderate (weight loss  
91 between 10.5% and 16.2%, n=8 ferrets) and the highest quartile as severe (weight  
92 loss greater than 16.2%, n=6 ferrets).

93 We analyzed lung punch biopsies from both the upper and lower lungs of  
94 infected animals at day 8 post-infection (n=2 samples per animal) using our dual-  
95 color lectin microarray method. Lectin microarrays use carbohydrate-binding  
96 proteins of known specificities as probes for glycan structure and provide a systems-  
97 level view of the glycome (6-8). For control animals, additional biopsy locations (n=6  
98 samples total per animal, 4 ferrets) were analyzed for additional statistical power. In  
99 brief, ferret lung samples were processed and fluorescently labeled using standard  
100 methods (7). Samples were analyzed on the lectin microarray (92 probes,  
101 **Supplemental Table 1**) against a reference mixture consisting of all samples  
102 labeled with an orthogonal fluorophore. A heatmap of the normalized data, ordered  
103 by severity is shown in **Figure 1a**.

104 Given the importance of sialic acid to influenza virus biology, we examined  
105 our data to determine whether either  $\alpha$ -2,6-linked (lectins: SNA, TJA-I, **Fig. 1b**,  
106 **Supplemental Fig. 1a**) or  $\alpha$ -2,3-linked sialic acid levels (MAA, MAL-I, MAL-II, **Fig.**  
107 **1c**, **Supplemental Fig. 1b**) were responsive to infection. We observed no changes  
108 in  $\alpha$ -2,6-sialic acid, the target of the H1N1pdm09 HA (21). However, we saw a subtle,  
109 yet statistically significant, decrease in  $\alpha$ -2,3-sialic acid (~11-14% loss), which is  
110 cleaved by the viral neuraminidase (NA) (22, 23). The ganglioside GM1, a known  
111 lipid raft marker that co-localizes with HA in influenza-infected cells (24), increased  
112 in abundance upon infection as indicated by the binding of cholera toxin subunit B  
113 (~21% increase, **Supplemental Fig. 2a**). We also observed a loss of  $\alpha$ -GalNAc  
114 (HAA, HPA, 28-34% loss, **Supplemental Fig. 2b**), an epitope predominantly  
115 detected on mucins. None of these observed changes in the host glycome correlated  
116 with severity.

117 However, we did observe a severity-dependent glycomic signature: lectins  
118 that bound high mannose (HHL, GRFT, SVN, UDA, **Fig. 1c**, **Supplemental Fig. 3**)  
119 showed increased binding in a severity dependent manner. High mannose is an  
120 early product of the *N*-glycan pathway, predominantly seen as an intracellular  
121 epitope (12). These lectins showed a statistically significant ~47-50% increase in  
122 binding to lung tissue from severely infected animals compared to uninfected

123 controls. In contrast, ferrets with mild infections displayed a smaller increase in high  
124 mannose levels (~12-19%, dependent on lectin).

125 Overall, our lectin microarray data argues that although we see changes in  
126 sialic acids with infection, they have no correlation with severity. Rather, high  
127 mannose, an epitope not typically associated with influenza pathogenesis, appears  
128 to directly correlate with severity.

129

### 130 **Histopathology Shows High Mannose Associates with Alveolar Severity**

131 As the influenza virus infection progresses to a more severe state, it moves  
132 from the upper respiratory tract into the alveolar cells of the lungs. The earliest  
133 responses are seen in the infected airway or lung alveolar epithelial cells. These  
134 cells become damaged, leading to lung dysfunction and pneumonia (25). To more  
135 directly observe whether high mannose levels are associated with damage in ferret  
136 lung, we next performed lectin histology on inflated lung tissue from day 8 infected  
137 ferrets. In general, we observed a correlation between damage to the lung, as  
138 defined by consolidation and inflammatory cell infiltrate, and staining with the high  
139 mannose binding lectin HHL (**Fig. 2a**). In normal lung, HHL staining was confined to  
140 the bronchiole epithelium and basement membrane. In contrast, in infected and  
141 consolidated lung tissues we observed binding to compacted alveolar spaces and  
142 bronchial plugs. We also observed binding to inflammatory cells and sloughed  
143 bronchial epithelium. We observe a strong correlation between HHL staining and the  
144 alveolar severity score, which reflects alveolar damage and inflammation caused by  
145 the infection (**Fig. 2b**). Overall, our data shows that high mannose is associated with  
146 both direct damage to the lungs, observed by histology, and overall illness levels,  
147 observed by weight loss.

148

### 149 **High mannose is induced early in the course of infection.**

150 Viral titers in the lungs reach high levels early in the course of influenza  
151 infection and decline significantly by day 8, with few residual viral particles by day 14  
152 (**Supplemental Fig. 4**). At day 8 the virus is no longer replicating and is being  
153 eliminated from the lung (20). Host response to the virus is well established by this

154 point. If glycosylation plays a role in inducing the damage leading to severity, we  
155 would expect changes to be observed early in influenza pathogenesis.

156 To examine whether glycomic changes in the host occur early or late in  
157 influenza pathogenesis, we performed a time-course analysis where infected ferrets  
158 were sacrificed at days 1, 3, 5, 8, and 14 (n=12 for days 1-3, n=8 for day 5, n=19 for  
159 day 8, n=8 for day 14, for a total of 59 ferrets). We analyzed 2 lung punch biopsies  
160 per ferret. The time course experiments and our previously discussed analysis were  
161 performed concurrently and analyzed on the same set of arrays. Thus, data for day  
162 8 ferrets and control (day 0) samples are the same as in **Figure 1a**. Severity was  
163 determined by weight loss for ferrets sacrificed at days 8 and 14. Severity cannot be  
164 determined at earlier time points as the weight loss nadir has not been reached at  
165 days 1-5. Lung punch biopsies were analyzed as previously described. The heatmap  
166 for the overall analysis is shown in **Supplemental Fig. 5**.

167 Time course analysis revealed dynamic changes in host glycans upon  
168 infection. Levels of  $\alpha$ -2,6-linked sialic acid increased upon infection, plateauing at  
169 day 3 (~31% change), before decreasing to baseline levels by day 8 (**Supplemental**  
170 **Fig. 6a**). This dynamic change in host glycans may play a role in propagating the  
171 infection as  $\alpha$ -2,6-sialosides are the host receptor for human influenza virus,  
172 including H1N1pdm09. Levels of  $\alpha$ -2,3-linked sialic acid declined rapidly by day 1  
173 (~22%) and were only partially recovered at day 8 (**Supplemental Fig. 6b**). Levels  
174 of GM1 dramatically increased early in the course of infection (day 1, ~72%),  
175 perhaps due to increased viral budding from lipid rafts. These levels rapidly  
176 decreased by day 3, in line with decreased viral titers in the lung tissue  
177 (**Supplemental Figs. 5 & 6c**). Although these glycomic changes probably play a role  
178 in influenza pathogenesis, we cannot determine whether they influence severity at  
179 the early time points.

180 High mannose, which correlates to severity at day 8, was strongly induced in  
181 some ferrets at day 1 (**Fig. 3a**). At this early time point we are unable to predict  
182 whether ferrets with higher levels of high mannose have a more severe  
183 immunological response to influenza virus infection overall. However, HHL staining  
184 of virally infected lungs from ferrets sacrificed at day 1 correlated with damage in the

185 lung tissue (**Fig. 3b**), similar to observations at day 8 (**Fig. 2a**). This strongly  
186 suggests that high mannose is induced immediately upon infection with influenza  
187 virus and that the levels of the epitope are directly correlated with severity even at  
188 the early time points.

189

## 190 **Infection of Human Cell Lines with Influenza Induces High Mannose**

191 We next tested whether the induction of high mannose upon infection was  
192 specific to our ferret model or whether it could be observed in human cell culture  
193 models as well. For our initial experiments, we used the adenocarcinoma A549 cell  
194 line, a common cell line in influenza research (26, 27), which derives from human  
195 alveolar basal epithelia. In brief, cells were infected with A/Puerto  
196 Rico/8/1934(H1N1) (PR8), an H1N1 strain commonly used in cell culture  
197 experiments. After 24 h, cells were fixed and stained for influenza nucleoprotein  
198 (anti-influenza antibody, green) and high mannose (HHL, red, **Fig. 4a**). We observed  
199 strong induction of high mannose in infected cells. Treatment of cells with Endo H,  
200 an endoglycosidase specific for high mannose and hybrid structures (28), abolished  
201 lectin staining, as did treatment with methyl mannose (**Supplemental Fig. 7**),  
202 confirming the induction of high mannose upon infection. This epitope is induced  
203 both internally and at the cell surface, as confirmed by deconvolution microscopy  
204 (**Supplemental Fig. 8**). High mannose was observed to increase in internal  
205 structures early in the infection (8h, **Supplemental Fig. 9**) before migrating to the  
206 cell surface. To test whether the high mannose response occurs in primary human  
207 cells, we treated primary bronchial epithelia with PR8 and analyzed them as  
208 described. Again, we observed a strong increase in high mannose in response to  
209 viral infection (**Fig. 4b**). Infection of A549 cells with other influenza strains  
210 (H1N1pdm09, H3N2, influenza B, **Fig. 4c**), also resulted in an increase in high  
211 mannose, indicating that the response is not strain specific.

212 Given that high mannose is a precursor in the N-glycan pathway, a question  
213 that arises is whether high mannose could act as an independent signal without  
214 impacting complex N-glycan levels. Recent studies have shown that the trimming  
215 mannosidases, MAN1A1 and MAN1A2 can be independently deleted without



216 impacting complex N-glycans (29, 30). In addition, both enzymes are predicted to be  
217 highly regulated by miRNA (31), and miRNA downregulating MAN1A2 increased  
218 high mannose without decreasing core fucose, a marker of complex N-glycans (11).  
219 To test this more directly, we performed lectin microarray analysis of A549 cells  
220 infected with PR8 (**Fig. 5a, Supplemental Fig. 10**). In line with our observation in  
221 ferret lungs and our microscopy data, we again observed an increase in high  
222 mannose (GRFT, SVN, HHL, UDA). However, we did not observe a corresponding  
223 decrease in complex N-glycan epitopes (indicated by red \*: branching: PHA-L,  
224 polyLacNAc: DSA, WGA, core fucose: LcH). A decrease was observed in  $\alpha$ -2,6-  
225 linked sialic acid (SNA, TJA-II) in line with previous data on influenza infections in  
226 cell culture (32). Overall our data supports the ability of high mannose to act as a  
227 signal of infection and/or damage.

228

### 229 **Influenza Virus Induces High Mannose on Endogenous Glycoproteins.**

230 One possible source of high mannose is the influenza virus itself, which has  
231 three potential glycoproteins: HA, NA, and Matrix-2 protein (M2). HA is the major  
232 glycoprotein of influenza. *N*-glycosylation of HA is important in receptor binding,  
233 immune response, and viral stability (33). Glycosylation of NA is essential for the  
234 enzyme activity (33). M2, a small transmembrane protein of about 11 KD, is at 10-  
235 100 fold lower abundance than HA on the virus surface and has a putative *N*-  
236 glycosylation site at which glycosylation is not commonly observed (33-36). To  
237 determine whether the increase in high mannose was due to influenza virus  
238 glycoproteins or to changes in glycosylation of host proteins, we performed lectin  
239 blot analysis in tandem with Western blot analysis of HA and NA, the major influenza  
240 virus glycoproteins (**Fig. 5b, Supplemental Fig. 11**). Upon infection, we detect  
241 increased levels of high mannose across multiple proteins, both influenza and host,  
242 as determined by HHL binding. We observed a strong increase in high mannose for  
243 a band correlating to NA (indicated by arrows, **Fig. 5b**). Quantitation of the lectin  
244 blot, excluding presumed HA and NA proteins, reveals a 120% increase in HHL  
245 binding, indicating a major increase in high mannose on host proteins. Our data

246 shows that high mannose induced in human cells is an endogenous host response  
247 to influenza virus infection.

248

### 249 **High Mannose is Induced via the IRE1/XBP1 Pathway**

250 Recent work provides evidence for the involvement of the unfolded protein  
251 response (UPR) in determining influenza severity. Influenza virus activates the IRE1  
252 arm of the UPR pathway, inducing the active form of the transcription factor XBP1  
253 (XBP1s) (37). Influenza severity and lung injury in mouse models directly correlate  
254 with the degree of induction of this pathway (13). Recent studies have shown that  
255 activation of XBP1s in cells can alter glycosylation in a cell type dependent manner,  
256 providing a potential link between influenza infection and the observed changes in  
257 host glycosylation (38, 39). We first examined whether influenza infection activated  
258 the UPR pathway in our ferret model. Transcriptomic analysis revealed upregulation  
259 of key UPR markers HSP90B1 (also known as Grp94) and HYOU1 (40) in ferret lung  
260 on day 1 post-infection (**Fig. 6a**). This indicates that UPR is rapidly induced by  
261 influenza in ferrets, in line with previous observations in other systems (13, 37). To  
262 test whether there is a direct link between UPR activation by influenza virus and the  
263 induction of high mannose, we used the established UPR inhibitor 4 $\mu$ 8C (4-methyl  
264 umbelliferone 8-carbaldehyde) in our cell culture model. This inhibitor prevents  
265 splicing of XBP1, the key step in activation of XBP1s by IRE1 (41). Inhibition of UPR  
266 in PR8-infected A549 cells by 4 $\mu$ 8C (64  $\mu$ M) prevented high mannose induction by  
267 the virus (**Fig. 6b, Supplemental Fig. 12a**). This indicates that induction of the high  
268 mannose epitope occurs downstream of the XBP1s arm of the UPR. Lectin  
269 microarray analysis revealed 4 $\mu$ 8C inhibited high mannose but did not impact the  
270 change in sialylation observed upon infection, arguing that the impact of inhibiting  
271 this pathway is specific to the high mannose response (**Supplemental Fig. 12b**).

272

### 273 **Innate Immune Activator MBL2 Recognizes Infected Cells via High Mannose.**

274 Currently, there is an emerging consensus that over-activation of the innate  
275 immune response may be a dominant cause of lung injury and influenza severity  
276 (20, 25). Carbohydrate recognition plays a significant role in innate immunity

277 mediated by a series of innate immune lectins including the dendritic cell-specific  
278 intercellular adhesion molecule-3-grabbing non-integrin (DC-SIGN), human DC  
279 immunoreceptor (DCIR), langerin, dectin-2, mincle, mannan-binding lectin (MBL2),  
280 and surfactant proteins A and D (SP-A/D) (12, 42). Innate immune lectins are thought  
281 to protect against infection through recognition of foreign pathogens. We focused  
282 our attention on MBL2. MBL2 binds influenza viral particles and was originally  
283 ascribed a protective role (43). However, knockout of MBL2 in mouse mitigated the  
284 severity of influenza infection, rather than increasing viral load as originally theorized  
285 (18). Upon binding, MBL2 activates the complement cascade and corresponding  
286 inflammatory response (44). A recent study on critically ill patients infected with  
287 H1N1pdm09 virus showed a strong correlation between levels of MBL2 in the blood  
288 and patient death (19). In addition, schizophrenics and multiple sclerosis patients,  
289 both have high levels of MBL2 and unusually high death rates from influenza and  
290 pneumonia (45-48). These studies strongly suggest that MBL2 plays a determining  
291 role in the severity of response, but how this occurs is unknown.

292 MBL2 recognizes several glycan epitopes including Lewis structures (14, 15),  
293 high mannose (16), yeast mannans (17) and fucose (15). Given that high mannose  
294 is a ligand for MBL2, we wanted to test whether MBL2 would recognize influenza  
295 virus-infected human cells. We incubated infected and control A549 cells with  
296 recombinant human MBL2 and examined binding by fluorescence microscopy (**Fig.**  
297 **7**). Uninfected A549 cells were not recognized by MBL2. In contrast, infected cells  
298 were strongly recognized by the innate immune lectin.-This data is in keeping with  
299 previous work that demonstrated complement-dependent lysis of influenza-infected  
300 hamster cells mediated through binding of guinea pig mannan-binding lectin (49).

301 To test whether recognition is dependent upon the high mannose epitope, we  
302 removed all high mannose and hybrid N-glycans using Endo H. Removal of these  
303 glycans abolished the signal, providing evidence that the recognition is via the high  
304 mannose epitope (**Fig. 7**). Our data suggest a potential role for high mannose in  
305 recruiting MBL2 to host tissue in influenza virus infection; this could contribute to  
306 severity through activation of the complement cascade and corresponding  
307 inflammatory response.

308

## 309 **Conclusions**

310           Lectin-glycan interactions play a major role in infectious disease, impacting  
311 all stages from colonization to disease progression and host response (50-52).  
312 Current studies of these interactions almost exclusively focus on their roles in  
313 invasion or on innate immune lectin recognition of pathogen glycans (50). In contrast,  
314 little is known about change in the host glycome upon pathogen invasion and how  
315 this might impact disease progression.

316           Herein, we use a ferret model of influenza virus infection in tandem with our  
317 lectin microarray technology (6, 8) to study the host response to the 2009 H1N1  
318 influenza virus and its relationship to disease progression. Our data suggest that  
319 induction of high mannose upon influenza virus infection is a key mediator of  
320 severity. Based on our work and the current literature, we hypothesize that activation  
321 of the unfolded protein response (UPR) upon influenza infection turns on expression  
322 of high mannose, which is then recognized by the innate immune lectin MBL2,  
323 activating the complement cascade and subsequent inflammation (**Fig. 8**). Inhibition  
324 of the complement cascade with C3a inhibitors reduces damage in H5N1 influenza  
325 virus-infected mice, providing additional evidence for our hypothesis (53). Our results  
326 indicate that high mannose can be induced through the UPR upon influenza infection  
327 (**Fig. 6, Supplemental Fig. 12**). The use of high mannose by the cell, as a type of  
328 damage or distress signal, makes sense as it is not detected at the cell surface on  
329 most cell types, but is recognized by a significant number of innate immune lectins,  
330 including MBL2 (**Fig. 7**) (12). In addition, high mannose has the potential for  
331 independent regulation from the complex N-glycan pool (**Fig. 5a**) (11, 29-31). Taken  
332 together, our work provides a new mechanism that could explain the observation  
333 that both UPR activation and MBL2 levels directly associate with severity of outcome  
334 from influenza infection (13, 18, 19).

335           A picture is emerging in which high mannose could act as a signal to our  
336 immune system through MBL2 (and potentially other mannose-binding lectins) to  
337 clear damaged and infected cells. This hypothesis, which requires further testing,  
338 could be relevant for not only influenza but also other respiratory viruses where the

339 innate immune system plays a role in severity, such as SARS-CoV-2 (54). It predicts  
340 that an overabundance of high mannose (as seen in the ferrets) or high MBL2 (as  
341 seen in patients) can dysregulate the immune system, leading to severe damage  
342 and death. Notably, two populations that have high levels of activated MBL2,  
343 schizophrenics and multiple sclerosis patients, have unusually high death rates from  
344 influenza and pneumonia (45-48). Our work provides a potential new pathway for  
345 intervention in influenza virus infection that could spur the development of therapies  
346 that would make influenza virus-induced disease no more deadly than the common  
347 cold.

348

## 349 **METHODS**

350 **Influenza virus and infection of ferrets.** Fitch ferrets (*Mustela putorius furo*,  
351 female) were obtained from Triple F Farms (Sayre) and verified as negative for  
352 antibodies to circulating influenza A (H1N1 and H3N2) and B viruses. Adult ferrets  
353 were defined as 6-12 months of age. Ferrets were pair housed in stainless steel  
354 cages (Shor-Line) containing Sani-Chips laboratory animal bedding (P.J. Murphy  
355 Forest Products) and provided with food and fresh water ad libitum. Ferrets were  
356 administered intranasally the H1N1pdm09 virus, A/California/07/2009, at a dose of  
357  $10^6$  PFU. The animals were monitored daily for weight loss and disease symptoms  
358 including elevated temperature, low activity level, sneezing, and nasal discharge.  
359 Animals were randomly assigned to be sacrificed at day 1, 3, 5, 8, or 14 post-  
360 infection (DPI) or euthanized if their clinical condition (e.g., loss of >20% body  
361 weight) required it. Blood was collected from anesthetized ferrets via the subclavian  
362 vena cava post-infection. Serum was harvested and frozen at  $-20 \pm 5^\circ\text{C}$ . After serum  
363 was collected, necropsies were performed to collect lung tissue. Severity of infection  
364 was determined for all ferrets studied who were sacrificed at day 8 or later (n=45)  
365 using quartiles to define populations. The lowest quartile was defined as mild (weight  
366 loss less than 10.5%), the middle quartile as moderate (weight loss between 10.5%  
367 and 16.2%), and the highest quartile as severe (weight loss greater than 16.2%).  
368

369 **Lectin microarray.** Ferret lung tissue samples were washed with PBS  
370 supplemented with protease inhibitor cocktails (PIC) and sonicated on ice in PBS  
371 with PIC until it was completely homogenous. Then the homogenized samples were  
372 prepared and Alexa Fluor 647-labeled as previously described (7). Reference was  
373 prepared by mixing equal amounts (by total protein) of all samples and labeled with  
374 Alexa Fluor 555 (Thermo Fisher). **Supplemental Table 1** summarizes the print list  
375 and buffers. Printing, hybridization, and data analysis were performed as previously  
376 described (7).

377

378 **Lectin histochemistry.** Formalin-fixed paraffin embedded (FFPE) sections (5  $\mu$ m)  
379 containing left upper and lower lung lobes were cleared in HistoClear (3 x 5 min)  
380 (National Diagnostics). Sections were rehydrated with graded alcohols as follows:  
381 100% ethanol (2 x 5 min), 95% ethanol (1 x 5 min), 70% ethanol (1 x 5 min), and H<sub>2</sub>O  
382 (1 x 5 min). To inactivate endogenous peroxidases, rehydrated sections were  
383 immersed in 3% H<sub>2</sub>O<sub>2</sub>/70% methanol solution (Fisher Scientific) for 30 min. Sections  
384 were incubated with biotin-conjugated HHL (1:300, Vector Laboratories) overnight  
385 at 4°C. After washing in PBS, sections were incubated with an avidin/biotin-based  
386 peroxidase system (VECTASTAIN Elite ABC HRP Kit, Vector Laboratories) followed  
387 by substrate deposition with VECTOR NovaRED Peroxidase (HRP) Substrate Kit  
388 (Vector Laboratories). Nuclear counterstain was performed with Gill's Hematoxylin  
389 (American MasterTech Scientific) followed by mounting with Permount (Fisher  
390 Scientific).

391

392 **Cell culture and infection assays.** The A549 cell line (ATCC) was grown in media  
393 [F-12K medium with 10% (vol/vol) FBS (Atlanta Biologicals)] at 37°C in 5% CO<sub>2</sub>. For  
394 the infection assay, A549 cells were seeded at a density of 250,000 cells in a 35 mm  
395 glass-bottom dish and allowed to grow under standard culture conditions (37°C, 5%  
396 CO<sub>2</sub>); 24 h later the dish was washed with PBS and treated with PR8 virus (MOI =  
397 2) in the infection medium [F-12K with 2% BSA fraction V (Thermo Fisher), 1%  
398 antibiotic-antimycotic (Thermo Fisher), and 1  $\mu$ g/ml TPCK-treated trypsin  
399 (Worthington Biochemical)] for 1 h (37 °C, 5% CO<sub>2</sub>). The cells were washed with the

400 infection medium and incubated in the infection medium for 8, 6, or 24 h, as indicated  
401 prior to harvesting. Control cells were treated identically, however no PR8 virus was  
402 added to the media. IRE1 inhibition: Cells were seeded at a density of 120,000 cells  
403 in 35 mm glass-bottom dishes and grown in standard condition. After 24 h cells were  
404 treated with either IRE1 inhibitor 4 $\mu$ 8C (64  $\mu$ M) or DMSO (Control). After an  
405 additional 24 h, cells were treated with PR8 virus as described above. For IRE1  
406 inhibitor treated cells, 4 $\mu$ 8C (64  $\mu$ M) was maintained in the culture media throughout  
407 the infection. All cells were then either lysed for Western blot analysis, processed for  
408 lectin microarray analysis (7), or fixed and stained for fluorescence imaging.

409

410 **Fluorescence microscopy.** Cells were fixed with 4% paraformaldehyde in PBS (30  
411 min, RT), washed 3 x with PBS, and permeabilized with 0.2% Triton-X in PBS (5  
412 min). Fixed cells were washed with PBS and blocked for 1 h (PBS, 1% BSA) at 37°C  
413 (5% CO<sub>2</sub>). Cells were stained with both biotinylated HHL (20  $\mu$ g/ml in 10 mM HEPES  
414 buffer; Vector Laboratories) and mouse anti-influenza A (1  $\mu$ g/ml in 10 mM HEPES  
415 buffer; Abcam) for 1 h at 37°C. After washing 3 x with PBS, cells were stained with  
416 Cy5-streptavidin (10  $\mu$ g/ml; ThermoFisher) and anti-mouse IgG Cy3 (5  $\mu$ g/ml; 1 h,  
417 37 °C; Abcam) in PBS for 1 h (37°C, 5% CO<sub>2</sub>). After washing 3x with PBS, the cells  
418 were stained with DAPI (600 nM; 5 min, RT; ThermoFisher) prior to imaging.  
419 Samples were imaged using a 40 $\times$  PlanFluor objective, NA 0.3 and a Quad filter  
420 cube (DAPI, FITC, Texas Red, Cy5) on an Eclipse TE 2000-U microscope (Nikon).  
421 A minimum of six images were obtained for each sample in each channel. Samples  
422 stained with the same lectin or antibodies were imaged under identical conditions.  
423 Endo H controls: Cells were treated with Endo H (NEB, 1:10 in glycobuffer 3; 1h, 37  
424 °C, 5% CO<sub>2</sub>) prior to HHL staining. Mannose inhibition: biotinylated HHL was  
425 incubated with methyl mannose (200 mM; 30 min, RT; Sigma) prior to HHL staining.

426

427 **MBL2 staining of A549 cells.** A549 cells were cultured and fixed and blocked as  
428 previously described. Cells were stained with MBL2 [10  $\mu$ g/ml in MBL2 binding buffer  
429 (20 mM Tris, 1 M NaCl, 10 mM CaCl<sub>2</sub>, 15 mM NaN<sub>3</sub>, 0.05% triton X-100, pH 7.4); 1  
430 h, 37 °C; Abcam]. After washing with MBL2 wash buffer (10 mM Tris, 145 mM NaCl,

431 5 mM CaCl<sub>2</sub>, 0.05% tween-20, pH 7.4) 3 x, cells were stained with mouse  
432 monoclonal anti-MBL (Biotin) (2 µg/ml in MBL2 wash buffer; 1 h, 37 °C; Abcam) and  
433 mouse monoclonal anti-influenza A that had been labeled with Cy3 dye and dialyzed  
434 following the manufacturers protocol (1 µg/ml in MBL2 wash buffer; 1 h, 37 °C;  
435 Abcam). Cells were washed 3 x (MBL2 wash buffer) and stained with both Cy5  
436 Streptavidin (10 µg/ml; Vector Laboratories) in MBL2 wash buffer for 1 h at 37 °C  
437 (5% CO<sub>2</sub>). Cells were then washed 3 x (MBL2 wash buffer) and stained with DAPI  
438 (600 nM in MBL2 wash buffer; 5 min, RT; ThermoFisher) before imaging. Samples  
439 were imaged by fluorescence microscopy as described above. Endo H treated  
440 controls were prepared as described above.

### **Acknowledgements**

The University of Georgia Institutional Animal Care and Use Committee approved all experiments under the Animal Use Protocol #2015-04-007, which were conducted in accordance with the National Research Council's Guide for the Care and Use of Laboratory Animals, The Animal Welfare Act, and the CDC/NIH's Biosafety in Microbiological and Biomedical Laboratories guide. We thank Dr. Matthew D. Shoulders at M.I.T. for advice and Boval Biosolutions for lyophilized protease- and IgG-free bovine serum albumin (no. LY-0081). We thank Dr. Peter Palese and Dr. Adolfo Garcia-Sastre for providing the PR8 RGs plasmids. This work was supported by NIAID/NIH U01 AI111598 to E. Ghedin, B. Zhang, and L. Mahal. Publication of this research was supported, in part, thanks to funding from the Canada Excellence Research Chairs Program (L. Mahal).

### **References**

- 441 1. A. D. Iuliano *et al.*, Estimates of global seasonal influenza-associated respiratory  
442 mortality: a modelling study. *The Lancet* **391**, 1285-1300 (2018).  
443 2. A. Clem, S. Galwankar, Seasonal influenza: waiting for the next pandemic. *J Glob*  
444 *Infect Dis* **1**, 51-56 (2009).  
445 3. J. M. Nicholls, The battle between influenza and the innate immune response in  
446 the human respiratory tract. *Infect Chemother* **45**, 11-21 (2013).  
447 4. Anonymous, <J. Biol. Chem.-1993-Atkins-19188-91.pdf>.



- 448 5. N. Jia *et al.*, Glycomic characterization of respiratory tract tissues of ferrets:  
449 implications for its use in influenza virus infection studies. *J Biol Chem* **289**,  
450 28489-28504 (2014).
- 451 6. K. T. Pilobello, D. E. Slawek, L. K. Mahal, A ratiometric lectin microarray  
452 approach to analysis of the dynamic mammalian glycome. *Proc Natl Acad Sci U*  
453 *S A* **104**, 11534-11539 (2007).
- 454 7. K. T. Pilobello, P. Agrawal, R. Rouse, L. K. Mahal, Advances in lectin microarray  
455 technology: optimized protocols for piezoelectric print conditions. *Current*  
456 *protocols in chemical biology* **5**, 1-23 (2013).
- 457 8. K. T. Pilobello, L. Krishnamoorthy, D. Slawek, L. K. Mahal, Development of a  
458 lectin microarray for the rapid analysis of protein glycopatterns. *Chembiochem*  
459 **6**, 985-989 (2005).
- 460 9. F. S. Dawood *et al.*, Estimated global mortality associated with the first 12  
461 months of 2009 pandemic influenza A H1N1 virus circulation: a modelling  
462 study. *Lancet Infect Dis* **12**, 687-695 (2012).
- 463 10. P. Agrawal *et al.*, A Systems Biology Approach Identifies FUT8 as a Driver of  
464 Melanoma Metastasis. *Cancer Cell* **31**, 804-819 e807 (2017).
- 465 11. P. Agrawal *et al.*, Mapping posttranscriptional regulation of the human glycome  
466 uncovers microRNA defining the glycode. *Proc Natl Acad Sci U S A* **111**, 4338-  
467 4343 (2014).
- 468 12. I. Loke, D. Kolarich, N. H. Packer, M. Thaysen-Andersen, Emerging roles of  
469 protein mannosylation in inflammation and infection. *Mol Aspects Med* **51**, 31-  
470 55 (2016).
- 471 13. E. R. Hrinčius *et al.*, Acute Lung Injury Results from Innate Sensing of Viruses  
472 by an ER Stress Pathway. *Cell Rep* **11**, 1591-1603 (2015).
- 473 14. M. Terada *et al.*, Characterization of oligosaccharide ligands expressed on  
474 SW1116 cells recognized by mannan-binding protein. A highly fucosylated  
475 polylactosamine type N-glycan. *J Biol Chem* **280**, 10897-10913 (2005).
- 476 15. N. Kawasaki *et al.*, Highly fucosylated N-glycan ligands for mannan-binding  
477 protein expressed specifically on CD26 (DPPVI) isolated from a human  
478 colorectal carcinoma cell line, SW1116. *Glycobiology* **19**, 437-450 (2009).
- 479 16. J. N. Arnold *et al.*, Interaction of mannan binding lectin with alpha2  
480 macroglobulin via exposed oligomannose glycans: a conserved feature of the  
481 thiol ester protein family? *J Biol Chem* **281**, 6955-6963 (2006).
- 482 17. T. Miyakawa *et al.*, A secreted protein with plant-specific cysteine-rich motif  
483 functions as a mannose-binding lectin that exhibits antifungal activity. *Plant*  
484 *Physiol* **166**, 766-778 (2014).
- 485 18. M. T. Ling *et al.*, Mannose-binding lectin contributes to deleterious  
486 inflammatory response in pandemic H1N1 and avian H9N2 infection. *J Infect*  
487 *Dis* **205**, 44-53 (2012).
- 488 19. E. Zogheib *et al.*, Prospective Observational Study on the Association Between  
489 Serum Mannose-Binding Lectin Levels and Severe Outcome in Critically Ill  
490 Patients with Pandemic Influenza Type A (H1N1) Infection. *Lung* **196**, 65-72  
491 (2018).
- 492 20. T. Rowe *et al.*, Modeling host responses in ferrets during A/California/07/2009  
493 influenza infection. *Virology* **401**, 257-265 (2010).

- 494 21. R. Xu, R. McBride, C. M. Nycholat, J. C. Paulson, I. A. Wilson, Structural  
495 characterization of the hemagglutinin receptor specificity from the 2009 H1N1  
496 influenza pandemic. *J Virol* **86**, 982-990 (2012).
- 497 22. G. M. Air, Influenza neuraminidase. *Influenza Other Respir Viruses* **6**, 245-256  
498 (2012).
- 499 23. T. Gerlach *et al.*, Characterization of the neuraminidase of the H1N1/09  
500 pandemic influenza virus. *Vaccine* **30**, 7348-7352 (2012).
- 501 24. G. P. Leser, R. A. Lamb, Influenza virus assembly and budding in raft-derived  
502 microdomains: a quantitative analysis of the surface distribution of HA, NA and  
503 M2 proteins. *Virology* **342**, 215-227 (2005).
- 504 25. S. Herold, C. Becker, K. M. Ridge, G. R. Budinger, Influenza virus-induced lung  
505 injury: pathogenesis and implications for treatment. *Eur Respir J* **45**, 1463-  
506 1478 (2015).
- 507 26. X. Ding *et al.*, Preliminary Proteomic Analysis of A549 Cells Infected with Avian  
508 Influenza Virus H7N9 and Influenza A Virus H1N1. *PLoS One* **11**, e0156017  
509 (2016).
- 510 27. P. F. Simon *et al.*, Highly Pathogenic H5N1 and Novel H7N9 Influenza A Viruses  
511 Induce More Profound Proteomic Host Responses than Seasonal and Pandemic  
512 H1N1 Strains. *J Proteome Res* **14**, 4511-4523 (2015).
- 513 28. K. Ohtsubo, J. D. Marth, Glycosylation in cellular mechanisms of health and  
514 disease. *Cell* **126**, 855-867 (2006).
- 515 29. Z. C. Jin *et al.*, Genetic disruption of multiple alpha1,2-mannosidases generates  
516 mammalian cells producing recombinant proteins with high-mannose-type N-  
517 glycans. *J Biol Chem* **293**, 5572-5584 (2018).
- 518 30. W. Tian *et al.*, The glycosylation design space for recombinant lysosomal  
519 replacement enzymes produced in CHO cells. *Nat Commun* **10**, 1785 (2019).
- 520 31. B. T. Kasper, S. Koppolu, L. K. Mahal, Insights into miRNA regulation of the  
521 human glycome. *Biochem Biophys Res Commun* **445**, 774-779 (2014).
- 522 32. J. Cho, Y. Miyake, A. Honda, K. Kushiro, M. Takai, Analysis of the Changes in  
523 Expression Levels of Sialic Acid on Influenza-Virus-Infected Cells Using Lectin-  
524 Tagged Polymeric Nanoparticles. *Front Microbiol* **7**, 1147 (2016).
- 525 33. C. Y. Wu *et al.*, Influenza A surface glycosylation and vaccine design. *Proc Natl*  
526 *Acad Sci U S A* **114**, 280-285 (2017).
- 527 34. R. M. Pielak, J. J. Chou, Influenza M2 proton channels. *Biochim Biophys Acta*  
528 **1808**, 522-529 (2011).
- 529 35. L. J. Holsinger, D. Nichani, L. H. Pinto, R. A. Lamb, Influenza A virus M2 ion  
530 channel protein: a structure-function analysis. *J Virol* **68**, 1551-1563 (1994).
- 531 36. R. A. Lamb, S. L. Zebedee, C. D. Richardson, Influenza virus M2 protein is an  
532 integral membrane protein expressed on the infected-cell surface. *Cell* **40**, 627-  
533 633 (1985).
- 534 37. I. H. Hassan *et al.*, Influenza A viral replication is blocked by inhibition of the  
535 inositol-requiring enzyme 1 (IRE1) stress pathway. *J Biol Chem* **287**, 4679-  
536 4689 (2012).
- 537 38. M. B. Dewal *et al.*, XBP1s Links the Unfolded Protein Response to the Molecular  
538 Architecture of Mature N-Glycans. *Chem Biol* **22**, 1301-1312 (2015).

- 539 39. M. Y. Wong *et al.*, XBP1s activation can globally remodel N-glycan structure  
540 distribution patterns. *Proc Natl Acad Sci U S A* **115**, E10089-E10098 (2018).
- 541 40. M. D. Shoulders *et al.*, Stress-independent activation of XBP1s and/or ATF6  
542 reveals three functionally diverse ER proteostasis environments. *Cell Rep* **3**,  
543 1279-1292 (2013).
- 544 41. B. C. Cross *et al.*, The molecular basis for selective inhibition of unconventional  
545 mRNA splicing by an IRE1-binding small molecule. *Proc Natl Acad Sci U S A*  
546 **109**, E869-878 (2012).
- 547 42. D. A. Wesener, A. Dugan, L. L. Kiessling, Recognition of microbial glycans by  
548 soluble human lectins. *Curr Opin Struct Biol* **44**, 168-178 (2017).
- 549 43. E. M. Anders, C. A. Hartley, P. C. Reading, R. A. Ezekowitz, Complement-  
550 dependent neutralization of influenza virus by a serum mannose-binding  
551 lectin. *J Gen Virol* **75 ( Pt 3)**, 615-622 (1994).
- 552 44. M. W. Turner, The role of mannose-binding lectin in health and disease. *Mol*  
553 *Immunol* **40**, 423-429 (2003).
- 554 45. J. Y. Kwok, F. Vaida, R. M. Augst, D. Y. Yu, K. K. Singh, Mannose binding lectin  
555 mediated complement pathway in multiple sclerosis. *J Neuroimmunol* **239**, 98-  
556 100 (2011).
- 557 46. S. S. Jick, L. Li, G. J. Falcone, Z. P. Vassilev, M. A. Wallander, Epidemiology of  
558 multiple sclerosis: results from a large observational study in the UK. *J Neurol*  
559 **262**, 2033-2041 (2015).
- 560 47. M. Olfson, T. Gerhard, C. Huang, S. Crystal, T. S. Stroup, Premature Mortality  
561 Among Adults With Schizophrenia in the United States. *JAMA Psychiatry* **72**,  
562 1172-1181 (2015).
- 563 48. L. Foldager *et al.*, MBL and MASP-2 concentrations in serum and MBL2  
564 promoter polymorphisms are associated to schizophrenia. *Acta Neuropsychiatr*  
565 **24**, 199-207 (2012).
- 566 49. P. C. Reading, C. A. Hartley, R. A. Ezekowitz, E. M. Anders, A serum mannose-  
567 binding lectin mediates complement-dependent lysis of influenza virus-  
568 infected cells. *Biochem Biophys Res Commun* **217**, 1128-1136 (1995).
- 569 50. L. S. Kreisman, B. A. Cobb, Infection, inflammation and host carbohydrates: a  
570 Glyco-Evasion Hypothesis. *Glycobiology* **22**, 1019-1030 (2012).
- 571 51. R. C. Davicino, R. J. Elicabe, M. S. Di Genaro, G. A. Rabinovich, Coupling pathogen  
572 recognition to innate immunity through glycan-dependent mechanisms. *Int*  
573 *Immunopharmacol* **11**, 1457-1463 (2011).
- 574 52. A. J. Thompson, R. P. de Vries, J. C. Paulson, Virus recognition of glycan  
575 receptors. *Curr Opin Virol* **34**, 117-129 (2019).
- 576 53. S. Sun *et al.*, Inhibition of complement activation alleviates acute lung injury  
577 induced by highly pathogenic avian influenza H5N1 virus infection. *Am J Respir*  
578 *Cell Mol Biol* **49**, 221-230 (2013).
- 579 54. D. Blanco-Melo *et al.*, Imbalanced host response to SARS-CoV-2 drives  
580 development of COVID-19. *Cell ePub ahead of print.* (2020).

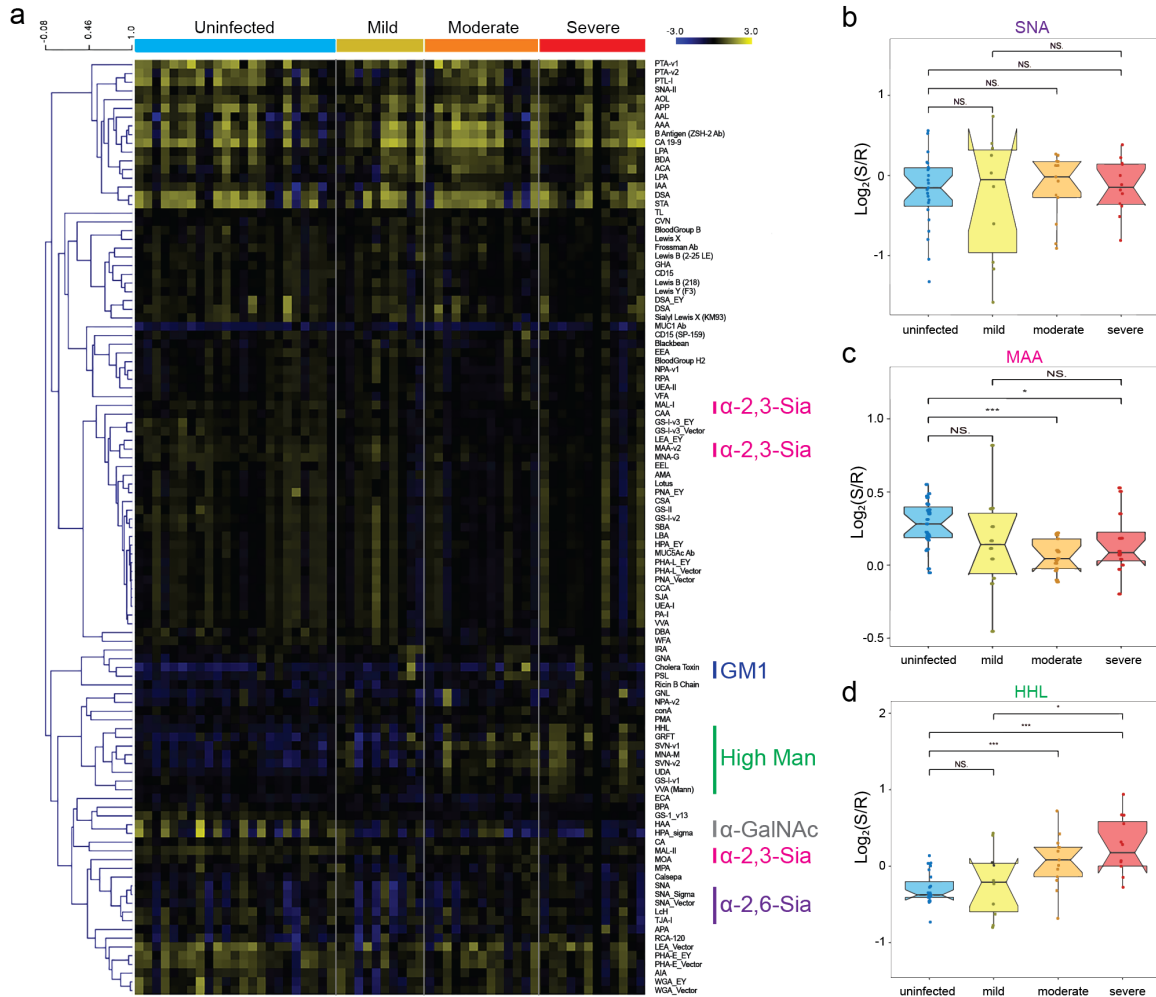

581 **Figure 1: Host glycosylation change in response to influenza infection.** a) Heat  
 582 map of lectin microarray data. Median normalized  $\log_2$  ratios (Sample (S)/Reference  
 583 (R)) of ferret lung samples were ordered by severity (uninfected, n=4 ferrets, 4  
 584 samples per ferret; d8 infected, n=19 ferrets (mild, n=5; moderate, n=8; severe, n=6;  
 585 2 samples per ferret). Yellow,  $\log_2(\text{S}) > \log_2(\text{R})$ ; blue,  $\log_2(\text{R}) > \log_2(\text{S})$ . Lectins  
 586 binding  $\alpha$ -2,6-sialosides (purple),  $\alpha$ -2,3-sialosides (pink), GM1 (blue), high mannose  
 587 (green) and N-acetylgalactosamine (grey) are indicated on the right. b) Boxplot  
 588 analysis of lectin binding by SNA ( $\alpha$ -2,6-sialosides). c) MAA ( $\alpha$ -2,3-sialosides) and  
 589 HHL (high mannose) as a function of severity. (uninfected:blue, mild: yellow,  
 590 moderate: orange, high: red). N.S.: Not statistical, \*\*:  $p < 0.01$ , \*\*\*:  $p < 0.001$ ,  
 591 Wilcoxon's t-test.



606

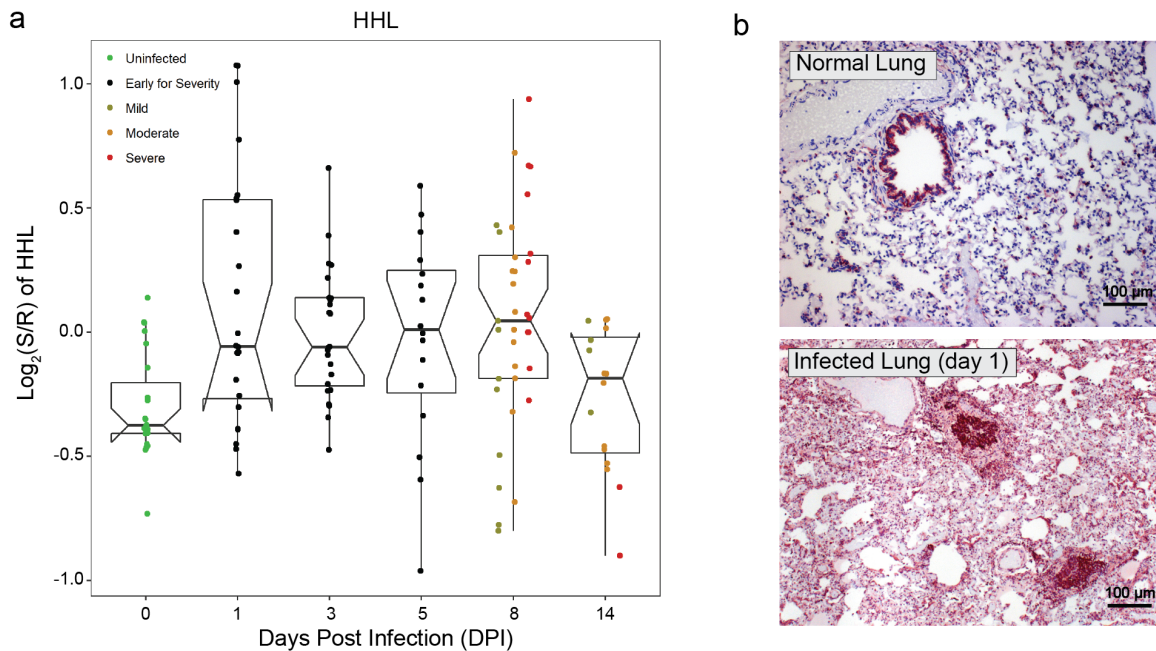

607

608

609

610

611

612

613

614

615

616

**Figure 3: High mannose was induced at early time points in response to influenza virus infection.** a) Boxplot analysis of high mannose (HHL-binding) at different time points following H1N1pdm09 virus infection (t= 0, 1, 3, 5, 8, 14 days). Median normalized  $\text{log}_2$  ratios (S/R) of ferret lung samples were plotted. Severity is indicated by color (green: uninfected, black: early for severity, dark yellow: mild, orange: moderate, red: severe). b) Lectin histology of ferret lung tissue. FFPE tissues were stained with biotinylated HHL developed with avidin peroxidase (red) and counterstained with hematoxylin (blue). Scale bar: 100  $\mu\text{m}$ .

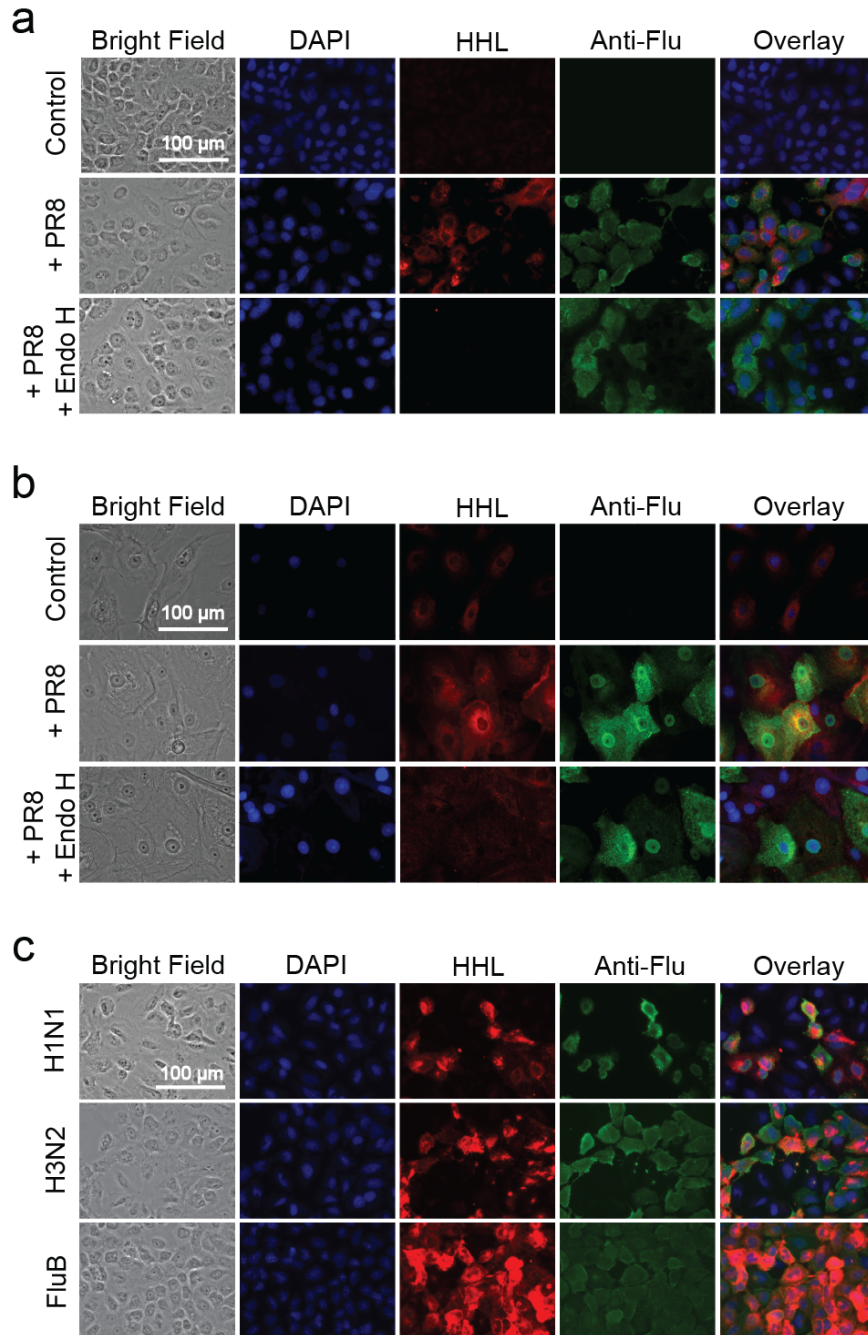

617

618

619

620

621

622

623

624

625

626

627

**Figure 4: High mannose response in human A549 cells as a result of influenza**

**virus infection.** Fluorescence microscopy of a) A549 cells 24 h post infection with

PR8, b) primary bronchial epithelial cells 24 h post infection with PR8 and c) A549

cells infected with additional influenza strains (H1N1pdm09, H3N2, Influenza B). All

cells were co-stained with biotinylated HHL (2°: streptavidin Cy5, red), mouse anti-

influenza nucleoprotein (anti-Flu) antibody (2°: anti-mouse IgG-Cy3, green), and

DAPI (blue). For Endo H controls, enzyme treatment was performed prior to staining.

Bright field and overlay images of DAPI, HHL and anti-Flu stained images are shown.

Scale bar: 100  $\mu$ m. For each experiment, three biological replicates were performed

and a minimum of six images was captured. Representative images are shown.

a

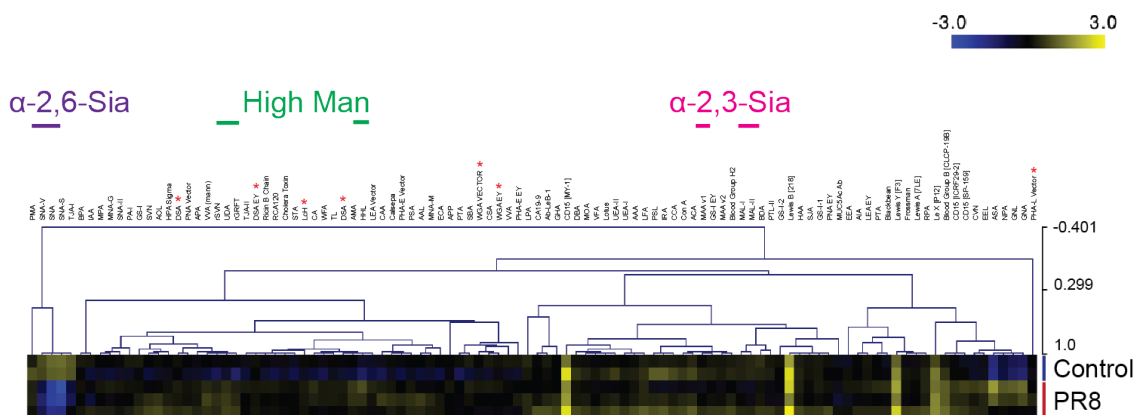

b

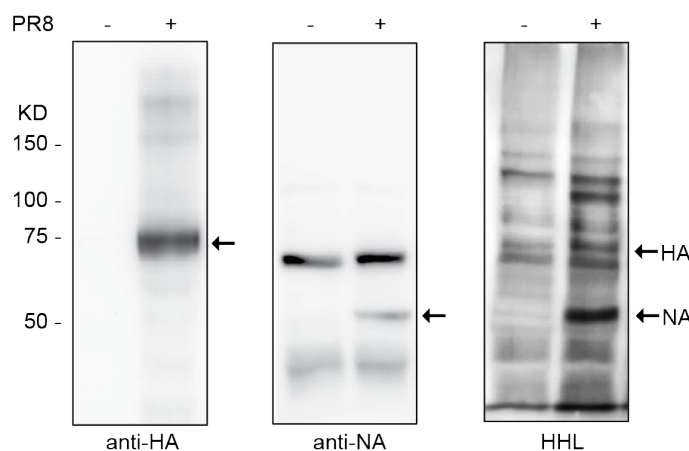

628  
629  
630  
631  
632  
633  
634  
635  
636  
637  
638  
639  
640  
641  
642  
643

**Figure 5: Lectin microarray and lectin blot analysis of influenza infected A549 cells.** a) Heat map of lectin microarray data. Median normalized log<sub>2</sub> ratios (Sample (S)/Reference (R)) of samples from A549 cells infected with PR8 (n=3) or uninfected controls (n=2). Yellow, log<sub>2</sub>(S) > log<sub>2</sub>(R); blue, log<sub>2</sub>(R) > log<sub>2</sub>(S). Lectins binding  $\alpha$ -2,6-sialosides (purple),  $\alpha$ -2,3-sialosides (pink) and high mannose (green) are indicated at top. Red \* indicates lectins binding complex N-glycans. Graphical representation of select lectin data is shown in **Supplemental Fig. 10**. b) Western blot and lectin blot analysis of the A549 cells. Duplicate lanes were run simultaneously and transferred to nitrocellulose. Blot was then divided and stained for either influenza proteins (rabbit polyclonal anti-HA (1:1000) or rabbit polyclonal anti-NA (1:1000)) and developed with anti-rabbit-HRP (1:5000) or for high mannose (biotinylated HHL (20  $\mu$ g/mL) followed by streptavidin HRP (1:5000)). HA and NA proteins are indicated by arrows. Even loading was checked by Ponceau (**Supplemental Fig. 11**).



644

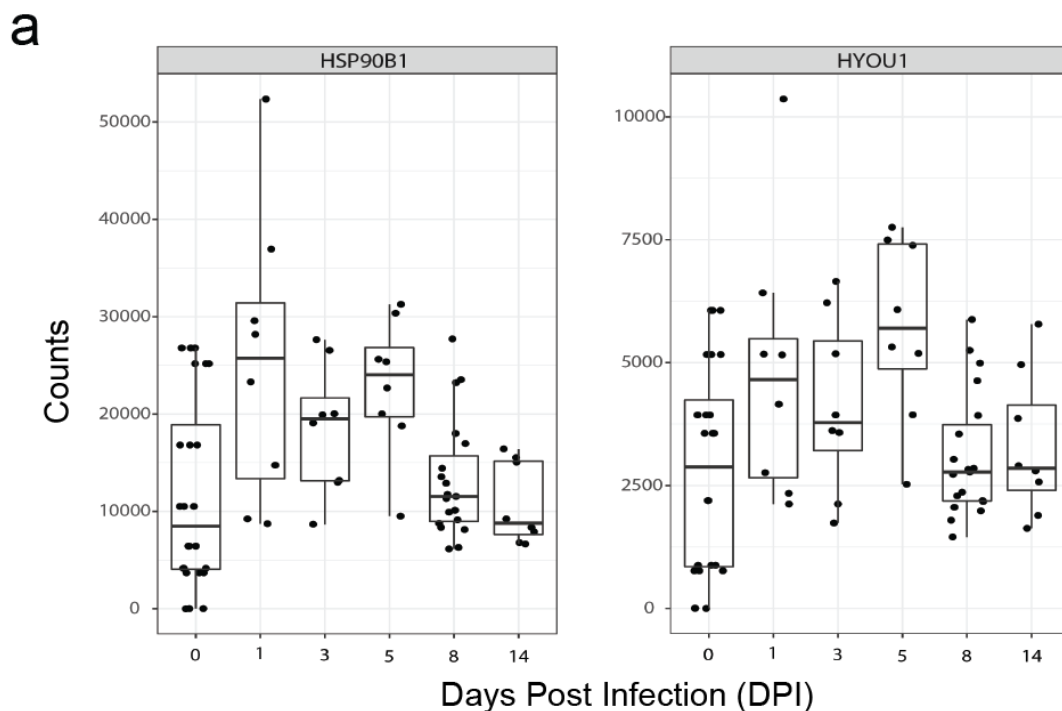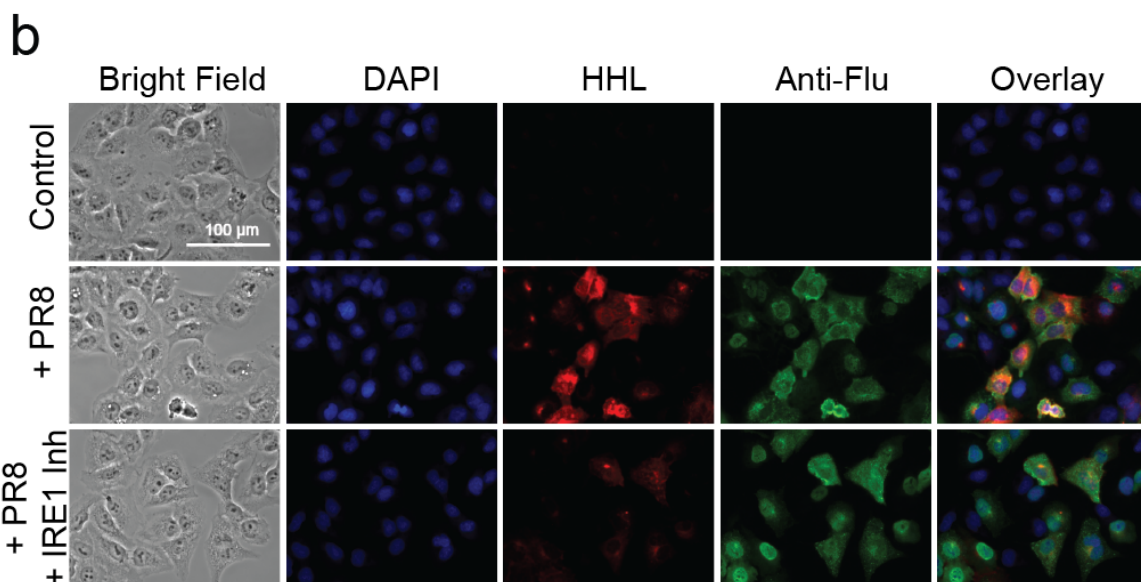

645

646

647 **Figure 6: High mannose is induced via the unfolded protein response.** a)

648 Boxplot analysis of transcript levels of UPR markers HSP90B1 and HYOU1 in lung

649 tissues from H1N1pdm09 infected ferrets from time course analysis. b) Fluorescence

650 microscopy of A549 cells treated with IRE1 inhibitor 4 $\mu$ 8C (24 h) prior to infection.

651 Cells were fixed, stained and imaged as previously described. Scale bar: 100  $\mu$ m.

652 For each experiment, three biological replicates were performed and a minimum of

653 six images was captured. Representative images are shown. Lectin microarray

654 analysis of A549 cells treated as in b is shown in **Supplemental Figure 12b**.

654

655

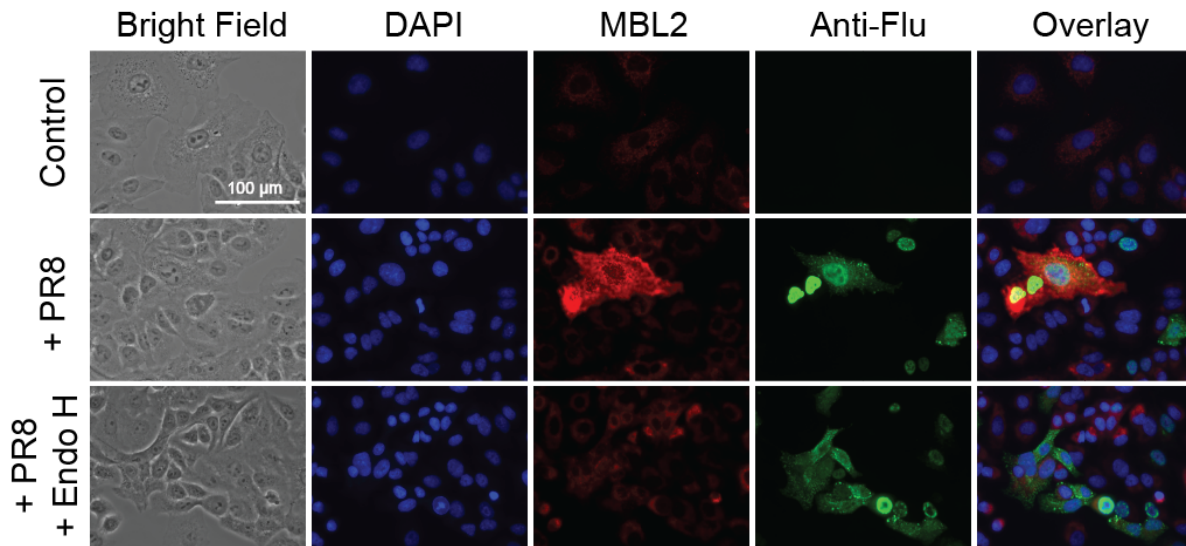

656

657

658 **Figure 7: Mannose is recognized by mannose binding lectin (MBL2).** MBL2  
659 staining of A549 cells. A549 cells (PR8 infected (24 h), and Control) were incubated  
660 with recombinant human MBL2 and stained with mouse anti-MBL (Biotin) antibody  
661 (2°:Cy3 Streptavidin, red). Cells were counterstained for infection (1°: mouse anti-  
662 Flu labeled with Cy3, green), and DAPI (blue). Scale bar: 100 µm. For each  
663 experiment, two biological replicates were performed and a minimum of six images  
664 was captured. Representative images are shown.

665

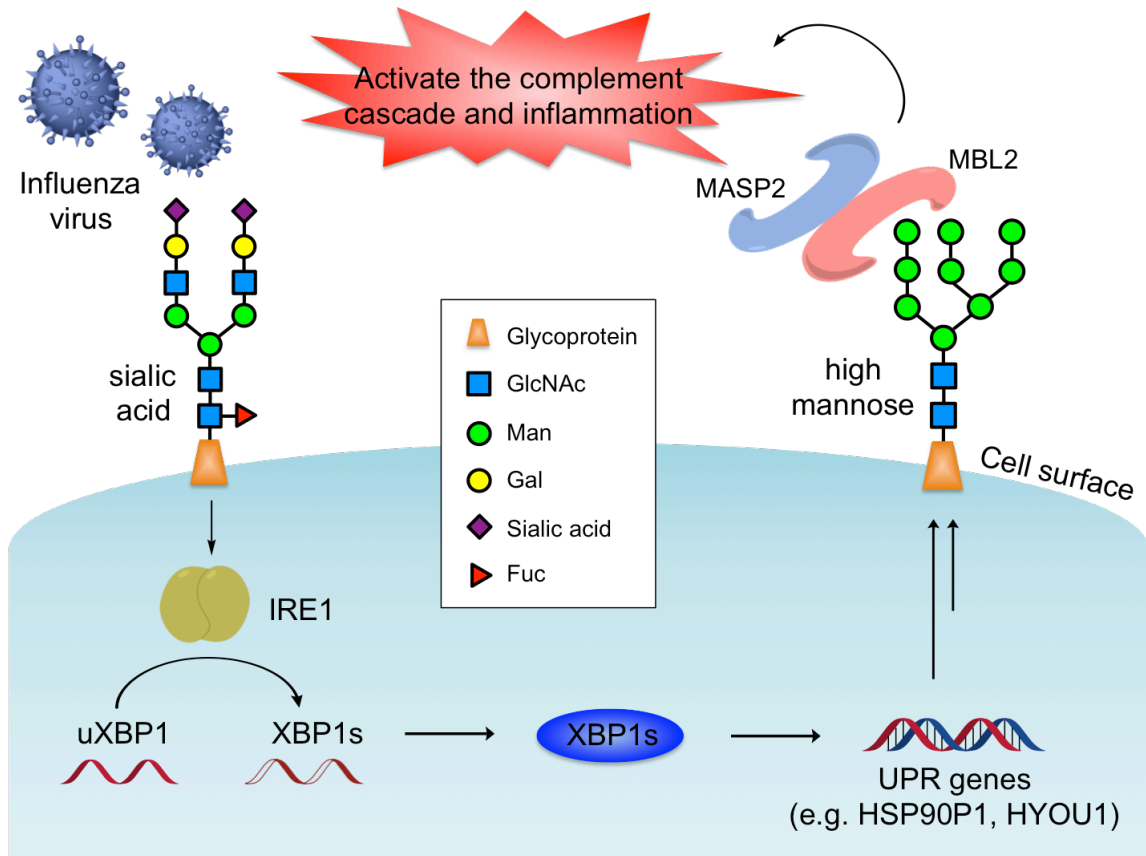

666  
667  
668  
669  
670  
671

**Figure 8: Schematic representation of proposed mechanism.** Influenza infection activates the IRE1 arm of the UPR, leading to the production of high mannose on the cell surface. High mannose is recognized by the innate immune lectin MBL2, which in turn activates the complement cascade and accompanying immune response, determining severity.
